# Supplementary material for: Dishevelled (Dvl-2) activates canonical Wnt signalling in the absence of cytoplasmic puncta
Source: Oxford University Press journal article supplement (doi:10.1242/jcs.02647), 2005-11-02
Supplement: jcs02647table.pdf [file jcs02647table.pdf]

## Supplementary Table

**Table S1.** Data from Improvisation Volocity 3DM analysis of HA-Dvl-2-GFP transiently ectopically expressed in HEK 293 cells

| ID  | Name     | Time                        | Total Length | Tracking ID | Total Length ( $\mu\text{m}$ ) | Velocity ( $\mu\text{m}/\text{sec}$ ) | Displacement ( $\mu\text{m}$ ) | Displacement Rate ( $\mu\text{m}/\text{sec}$ ) | Meandering Index | Time Sp |
|-----|----------|-----------------------------|--------------|-------------|--------------------------------|---------------------------------------|--------------------------------|------------------------------------------------|------------------|---------|
| 645 | Track 1  | 11:46:25.137 on 18-Mar-2005 | 39.5556      | 1           | 14.2897                        | 0.0297194                             | 3.42807                        | 0.00712963                                     | 0.260504         | 15      |
| 646 | Track 2  | 11:46:25.145 on 18-Mar-2005 | 34.6585      | 2           | 13.4271                        | 0.0300662                             | 3.26265                        | 0.00730579                                     | 0.214859         | 14      |
| 681 | Track 37 | 11:46:25.270 on 18-Mar-2005 | 21.6035      | 37          | 8.82714                        | 0.0214405                             | 4.76421                        | 0.0115719                                      | 0.684088         | 13      |
| 679 | Track 35 | 11:46:25.258 on 18-Mar-2005 | 18.7851      | 35          | 7.41612                        | 0.0180132                             | 1.4308                         | 0.00347531                                     | 0.235957         | 13      |
| 673 | Track 29 | 11:46:25.234 on 18-Mar-2005 | 25.9655      | 29          | 11.5615                        | 0.0306257                             | 5.03203                        | 0.0133296                                      | 0.609059         | 12      |
| 647 | Track 3  | 11:46:25.152 on 18-Mar-2005 | 15.7488      | 3           | 5.30016                        | 0.017123                              | 2.66697                        | 0.00861609                                     | 0.530515         | 10      |
| 701 | Track 57 | 11:46:25.331 on 18-Mar-2005 | 13.7782      | 57          | 6.70921                        | 0.0244847                             | 3.06312                        | 0.0111786                                      | 0.629062         | 9       |
| 699 | Track 55 | 11:46:25.323 on 18-Mar-2005 | 13.8835      | 55          | 4.84894                        | 0.0176958                             | 1.86531                        | 0.00680732                                     | 0.365005         | 9       |
| 675 | Track 31 | 11:46:25.242 on 18-Mar-2005 | 15.2305      | 31          | 6.64636                        | 0.0276347                             | 3.57102                        | 0.0148478                                      | 0.618877         | 8       |
| 648 | Track 4  | 11:46:25.157 on 18-Mar-2005 | 11.3845      | 4           | 5.08574                        | 0.0211127                             | 1.3821                         | 0.0057376                                      | 0.367866         | 8       |
| 713 | Track 69 | 11:46:25.365 on 18-Mar-2005 | 9.25068      | 69          | 4.37831                        | 0.0213149                             | 3.13477                        | 0.015261                                       | 0.851182         | 7       |
| 669 | Track 25 | 11:46:25.218 on 18-Mar-2005 | 15.806       | 25          | 5.7817                         | 0.0280214                             | 4.02001                        | 0.0194833                                      | 0.802372         | 7       |
| 715 | Track 71 | 11:46:25.373 on 18-Mar-2005 | 17.0359      | 71          | 7.27715                        | 0.0354273                             | 4.67817                        | 0.0227747                                      | 0.540012         | 7       |
| 649 | Track 5  | 11:46:25.162 on 18-Mar-2005 | 19.3793      | 5           | 7.38265                        | 0.0357694                             | 0.708738                       | 0.00343388                                     | 0.115385         | 7       |
| 684 | Track 40 | 11:46:25.280 on 18-Mar-2005 | 8.90526      | 40          | 3.41333                        | 0.01985                               | 2.44849                        | 0.014239                                       | 0.833599         | 6       |
| 664 | Track 20 | 11:46:25.201 on 18-Mar-2005 | 6.68697      | 20          | 2.41115                        | 0.0140195                             | 1.549                          | 0.00900659                                     | 0.715456         | 6       |
| 693 | Track 49 | 11:46:25.304 on 18-Mar-2005 | 7.87195      | 49          | 3.72006                        | 0.0217004                             | 1.33724                        | 0.00780061                                     | 0.535954         | 6       |
| 719 | Track 75 | 11:46:25.385 on 18-Mar-2005 | 6.41424      | 75          | 2.35504                        | 0.0171884                             | 1.71498                        | 0.012517                                       | 0.839965         | 5       |
| 676 | Track 32 | 11:46:25.245 on 18-Mar-2005 | 10.0018      | 32          | 4.7698                         | 0.0346711                             | 3.84362                        | 0.0279388                                      | 0.709713         | 5       |
| 666 | Track 22 | 11:46:25.207 on 18-Mar-2005 | 8.19974      | 22          | 3.94363                        | 0.0286906                             | 1.95947                        | 0.0142555                                      | 0.684399         | 5       |
| 683 | Track 39 | 11:46:25.276 on 18-Mar-2005 | 22.8023      | 39          | 7.79378                        | 0.0566044                             | 4.57886                        | 0.0332552                                      | 0.632435         | 5       |
| 708 | Track 64 | 11:46:25.351 on 18-Mar-2005 | 6.14211      | 64          | 2.05899                        | 0.0150236                             | 1.17696                        | 0.00858784                                     | 0.577309         | 5       |
| 694 | Track 50 | 11:46:25.308 on 18-Mar-2005 | 9.6999       | 50          | 3.57712                        | 0.026078                              | 1.71739                        | 0.0125202                                      | 0.486664         | 5       |
| 672 | Track 28 | 11:46:25.227 on 18-Mar-2005 | 9.20313      | 28          | 4.319                          | 0.0314082                             | 2.39019                        | 0.0173817                                      | 0.418489         | 5       |
| 727 | Track 83 | 11:46:25.408 on 18-Mar-2005 | 5.27834      | 83          | 2.80554                        | 0.0204906                             | 1.83296                        | 0.0133873                                      | 0.371396         | 5       |
| 667 | Track 23 | 11:46:25.211 on 18-Mar-2005 | 6.4555       | 23          | 2.25357                        | 0.0163951                             | 0.633914                       | 0.00461183                                     | 0.309814         | 5       |
| 716 | Track 72 | 11:46:25.377 on 18-Mar-2005 | 9.71008      | 72          | 3.1191                         | 0.0227672                             | 0.851797                       | 0.00621751                                     | 0.276766         | 5       |
| 720 | Track 76 | 11:46:25.388 on 18-Mar-2005 | 9.64442      | 76          | 3.23042                        | 0.0314349                             | 3.00295                        | 0.0292215                                      | 0.974448         | 4       |

|     |           |                             |         |     |          |           |          |            |          |   |
|-----|-----------|-----------------------------|---------|-----|----------|-----------|----------|------------|----------|---|
| 650 | Track 6   | 11:46:25.165 on 18-Mar-2005 | 5.19324 | 6   | 1.98629  | 0.0192261 | 1.54906  | 0.0149939  | 0.940436 | 4 |
| 730 | Track 86  | 11:46:25.416 on 18-Mar-2005 | 7.48229 | 86  | 2.43657  | 0.0237373 | 2.23687  | 0.0217919  | 0.931207 | 4 |
| 691 | Track 47  | 11:46:25.298 on 18-Mar-2005 | 9.84946 | 47  | 3.52444  | 0.0341719 | 2.97251  | 0.0288205  | 0.908563 | 4 |
| 714 | Track 70  | 11:46:25.368 on 18-Mar-2005 | 3.45209 | 70  | 1.49029  | 0.0145021 | 0.995878 | 0.00969094 | 0.883998 | 4 |
| 734 | Track 90  | 11:46:25.428 on 18-Mar-2005 | 10.8563 | 90  | 4.82996  | 0.0470541 | 3.6972   | 0.0360186  | 0.647399 | 4 |
| 707 | Track 63  | 11:46:25.348 on 18-Mar-2005 | 4.39444 | 63  | 2.64087  | 0.0256946 | 1.73664  | 0.0168968  | 0.644722 | 4 |
| 737 | Track 93  | 11:46:25.438 on 18-Mar-2005 | 4.08466 | 93  | 1.91272  | 0.018634  | 1.0834   | 0.0105546  | 0.537939 | 4 |
| 733 | Track 89  | 11:46:25.425 on 18-Mar-2005 | 3.3487  | 89  | 1.1448   | 0.0111528 | 0.621138 | 0.0060512  | 0.522535 | 4 |
| 651 | Track 7   | 11:46:25.168 on 18-Mar-2005 | 4.84231 | 7   | 1.58869  | 0.0153775 | 0.865273 | 0.00837531 | 0.522441 | 4 |
| 702 | Track 58  | 11:46:25.334 on 18-Mar-2005 | 4.9726  | 58  | 1.65637  | 0.0161063 | 0.740981 | 0.0072052  | 0.469032 | 4 |
| 725 | Track 81  | 11:46:25.401 on 18-Mar-2005 | 4.44536 | 81  | 3.08619  | 0.0300345 | 0.56681  | 0.00551615 | 0.3976   | 4 |
| 686 | Track 42  | 11:46:25.285 on 18-Mar-2005 | 3.07703 | 42  | 2.14897  | 0.0207929 | 0.33516  | 0.00324293 | 0.283318 | 4 |
| 680 | Track 36  | 11:46:25.262 on 18-Mar-2005 | 2.48562 | 36  | 1.82308  | 0.0176384 | 0.424373 | 0.00410584 | 0.241389 | 4 |
| 704 | Track 60  | 11:46:25.340 on 18-Mar-2005 | 3.92635 | 60  | 1.33326  | 0.0194577 | 1.32654  | 0.0193597  | 0.9955   | 3 |
| 729 | Track 85  | 11:46:25.413 on 18-Mar-2005 | 3.91668 | 85  | 1.29933  | 0.0189728 | 1.23961  | 0.0181009  | 0.99493  | 3 |
| 731 | Track 87  | 11:46:25.419 on 18-Mar-2005 | 3.80201 | 87  | 1.24178  | 0.0181325 | 1.21718  | 0.0177733  | 0.990695 | 3 |
| 668 | Track 24  | 11:46:25.213 on 18-Mar-2005 | 1.96778 | 24  | 0.843127 | 0.0122828 | 0.821628 | 0.0119696  | 0.990104 | 3 |
| 654 | Track 10  | 11:46:25.177 on 18-Mar-2005 | 2.37397 | 10  | 0.807531 | 0.0117231 | 0.771711 | 0.0112031  | 0.985376 | 3 |
| 703 | Track 59  | 11:46:25.337 on 18-Mar-2005 | 4.60392 | 59  | 1.4777   | 0.0215657 | 1.44426  | 0.0210777  | 0.981104 | 3 |
| 744 | Track 100 | 11:46:25.454 on 18-Mar-2005 | 4.06179 | 100 | 1.89549  | 0.0277074 | 1.51855  | 0.0221975  | 0.921185 | 3 |
| 670 | Track 26  | 11:46:25.221 on 18-Mar-2005 | 1.36349 | 26  | 1.04615  | 0.0152404 | 1.02511  | 0.014934   | 0.900092 | 3 |
| 724 | Track 80  | 11:46:25.398 on 18-Mar-2005 | 3.32095 | 80  | 1.78432  | 0.0260458 | 1.68233  | 0.024557   | 0.898884 | 3 |
| 700 | Track 56  | 11:46:25.326 on 18-Mar-2005 | 3.23607 | 56  | 1.0257   | 0.0149507 | 0.89649  | 0.0130674  | 0.874032 | 3 |
| 739 | Track 95  | 11:46:25.443 on 18-Mar-2005 | 2.78858 | 95  | 0.883861 | 0.0129062 | 0.769161 | 0.0112313  | 0.870228 | 3 |
| 712 | Track 68  | 11:46:25.361 on 18-Mar-2005 | 3.13437 | 68  | 1.06369  | 0.01553   | 0.889955 | 0.0129934  | 0.837382 | 3 |
| 745 | Track 101 | 11:46:25.457 on 18-Mar-2005 | 5.17883 | 101 | 1.64829  | 0.0240939 | 1.36922  | 0.0200145  | 0.833587 | 3 |
| 653 | Track 9   | 11:46:25.174 on 18-Mar-2005 | 4.02518 | 9   | 1.5932   | 0.0231288 | 1.36085  | 0.0197557  | 0.764926 | 3 |
| 726 | Track 82  | 11:46:25.404 on 18-Mar-2005 | 3.628   | 82  | 1.82936  | 0.0267031 | 0.983456 | 0.0143555  | 0.749242 | 3 |
| 732 | Track 88  | 11:46:25.421 on 18-Mar-2005 | 2.06372 | 88  | 0.914747 | 0.0133572 | 0.472492 | 0.00689935 | 0.722344 | 3 |
| 723 | Track 79  | 11:46:25.395 on 18-Mar-2005 | 3.57854 | 79  | 1.1541   | 0.016841  | 0.81874  | 0.0119473  | 0.711884 | 3 |
| 742 | Track 98  | 11:46:25.450 on 18-Mar-2005 | 11.7511 | 98  | 4.32868  | 0.0632745 | 2.79847  | 0.0409066  | 0.706882 | 3 |
| 652 | Track 8   | 11:46:25.171 on 18-Mar-2005 | 6.6219  | 8   | 2.3264   | 0.0337727 | 1.4829   | 0.0215276  | 0.706528 | 3 |
| 735 | Track 91  | 11:46:25.432 on 18-Mar-2005 | 2.15957 | 91  | 1.12323  | 0.0164015 | 0.767826 | 0.0112118  | 0.636409 | 3 |
| 695 | Track 51  | 11:46:25.311 on 18-Mar-2005 | 12.0071 | 51  | 4.8473   | 0.0706097 | 2.89738  | 0.0422057  | 0.595765 | 3 |
| 687 | Track 43  | 11:46:25.288 on 18-Mar-2005 | 2.47568 | 43  | 1.58718  | 0.0229956 | 0.337263 | 0.00488638 | 0.429806 | 3 |
| 655 | Track 11  | 11:46:25.179 on 18-Mar-2005 | 2.94845 | 11  | 1.32071  | 0.019173  | 0.779646 | 0.0113183  | 0.341508 | 3 |

|     |           |                             |          |     |          |            |          |            |   |   |
|-----|-----------|-----------------------------|----------|-----|----------|------------|----------|------------|---|---|
| 696 | Track 52  | 11:46:25.313 on 18-Mar-2005 | 0.628063 | 52  | 0.299048 | 0.00871094 | 0.299048 | 0.00871094 | 1 | 2 |
| 689 | Track 45  | 11:46:25.293 on 18-Mar-2005 | 1        | 45  | 0.316957 | 0.00917877 | 0.316957 | 0.00917877 | 1 | 2 |
| 698 | Track 54  | 11:46:25.317 on 18-Mar-2005 | 1        | 54  | 0.316957 | 0.0092326  | 0.316957 | 0.0092326  | 1 | 2 |
| 743 | Track 99  | 11:46:25.452 on 18-Mar-2005 | 1        | 99  | 0.316957 | 0.00925488 | 0.316957 | 0.00925488 | 1 | 2 |
| 722 | Track 78  | 11:46:25.393 on 18-Mar-2005 | 1.00306  | 78  | 0.333931 | 0.00974749 | 0.333931 | 0.00974749 | 1 | 2 |
| 678 | Track 34  | 11:46:25.251 on 18-Mar-2005 | 0.528099 | 34  | 0.385948 | 0.0112399  | 0.385948 | 0.0112399  | 1 | 2 |
| 705 | Track 61  | 11:46:25.342 on 18-Mar-2005 | 1.06301  | 61  | 0.386657 | 0.0112773  | 0.386657 | 0.0112773  | 1 | 2 |
| 721 | Track 77  | 11:46:25.390 on 18-Mar-2005 | 1.18936  | 77  | 0.387399 | 0.0113082  | 0.387399 | 0.0113082  | 1 | 2 |
| 685 | Track 41  | 11:46:25.282 on 18-Mar-2005 | 0.632567 | 41  | 0.396194 | 0.0114734  | 0.396194 | 0.0114734  | 1 | 2 |
| 661 | Track 17  | 11:46:25.192 on 18-Mar-2005 | 1.27475  | 17  | 0.404043 | 0.0117419  | 0.404043 | 0.0117419  | 1 | 2 |
| 706 | Track 62  | 11:46:25.344 on 18-Mar-2005 | 1.37437  | 62  | 0.435616 | 0.0127052  | 0.435616 | 0.0127052  | 1 | 2 |
| 748 | Track 104 | 11:46:25.464 on 18-Mar-2005 | 1.41421  | 104 | 0.448245 | 0.0131206  | 0.448245 | 0.0131206  | 1 | 2 |
| 658 | Track 14  | 11:46:25.186 on 18-Mar-2005 | 1.39642  | 14  | 0.452654 | 0.0131546  | 0.452654 | 0.0131546  | 1 | 2 |
| 662 | Track 18  | 11:46:25.194 on 18-Mar-2005 | 1.10554  | 18  | 0.471949 | 0.0137153  | 0.471949 | 0.0137153  | 1 | 2 |
| 741 | Track 97  | 11:46:25.447 on 18-Mar-2005 | 1.48268  | 97  | 0.477791 | 0.0139511  | 0.477791 | 0.0139511  | 1 | 2 |
| 747 | Track 103 | 11:46:25.461 on 18-Mar-2005 | 0.550685 | 103 | 0.505322 | 0.0147913  | 0.505322 | 0.0147913  | 1 | 2 |
| 711 | Track 67  | 11:46:25.358 on 18-Mar-2005 | 1.41421  | 67  | 0.548518 | 0.0160224  | 0.548518 | 0.0160224  | 1 | 2 |
| 746 | Track 102 | 11:46:25.459 on 18-Mar-2005 | 1.02242  | 102 | 0.593153 | 0.0173622  | 0.593153 | 0.0173622  | 1 | 2 |
| 682 | Track 38  | 11:46:25.272 on 18-Mar-2005 | 1.69967  | 38  | 0.624637 | 0.0181912  | 0.624637 | 0.0181912  | 1 | 2 |
| 717 | Track 73  | 11:46:25.379 on 18-Mar-2005 | 2        | 73  | 0.633914 | 0.018504   | 0.633914 | 0.018504   | 1 | 2 |
| 736 | Track 92  | 11:46:25.435 on 18-Mar-2005 | 0.978945 | 92  | 0.634325 | 0.0185281  | 0.634325 | 0.0185281  | 1 | 2 |
| 660 | Track 16  | 11:46:25.190 on 18-Mar-2005 | 1.03749  | 16  | 0.643606 | 0.0187039  | 0.643606 | 0.0187039  | 1 | 2 |
| 656 | Track 12  | 11:46:25.181 on 18-Mar-2005 | 2.3453   | 12  | 0.744608 | 0.0216391  | 0.744608 | 0.0216391  | 1 | 2 |
| 657 | Track 13  | 11:46:25.184 on 18-Mar-2005 | 2.13437  | 13  | 0.746732 | 0.0217009  | 0.746732 | 0.0217009  | 1 | 2 |
| 709 | Track 65  | 11:46:25.354 on 18-Mar-2005 | 2.37062  | 65  | 0.751385 | 0.0219482  | 0.751385 | 0.0219482  | 1 | 2 |
| 740 | Track 96  | 11:46:25.445 on 18-Mar-2005 | 0.849837 | 96  | 0.835006 | 0.0243815  | 0.835006 | 0.0243815  | 1 | 2 |
| 718 | Track 74  | 11:46:25.381 on 18-Mar-2005 | 2.73144  | 74  | 0.865916 | 0.0252762  | 0.865916 | 0.0252762  | 1 | 2 |
| 728 | Track 84  | 11:46:25.410 on 18-Mar-2005 | 2.47768  | 84  | 0.917392 | 0.0267962  | 0.917392 | 0.0267962  | 1 | 2 |
| 665 | Track 21  | 11:46:25.203 on 18-Mar-2005 | 1.63877  | 21  | 1.09771  | 0.0318418  | 1.09771  | 0.0318418  | 1 | 2 |
| 690 | Track 46  | 11:46:25.295 on 18-Mar-2005 | 3.75035  | 46  | 1.20868  | 0.035045   | 1.20868  | 0.035045   | 1 | 2 |
| 659 | Track 15  | 11:46:25.188 on 18-Mar-2005 | 2.44949  | 15  | 1.22569  | 0.0356198  | 1.22569  | 0.0356198  | 1 | 2 |
| 697 | Track 53  | 11:46:25.315 on 18-Mar-2005 | 4.47214  | 53  | 1.41748  | 0.0412895  | 1.41748  | 0.0412895  | 1 | 2 |
| 738 | Track 94  | 11:46:25.440 on 18-Mar-2005 | 5.04264  | 94  | 1.60372  | 0.0468432  | 1.60372  | 0.0468432  | 1 | 2 |
| 710 | Track 66  | 11:46:25.356 on 18-Mar-2005 | 5.18545  | 66  | 1.6737   | 0.0488892  | 1.6737   | 0.0488892  | 1 | 2 |
| 688 | Track 44  | 11:46:25.290 on 18-Mar-2005 | 2.87839  | 44  | 2.10487  | 0.0609551  | 2.10487  | 0.0609551  | 1 | 2 |
| 677 | Track 33  | 11:46:25.248 on 18-Mar-2005 | 7.45356  | 33  | 2.36246  | 0.0690488  | 2.36246  | 0.0690488  | 1 | 2 |

|     |          |                             |         |    |         |           |         |           |   |   |
|-----|----------|-----------------------------|---------|----|---------|-----------|---------|-----------|---|---|
| 663 | Track 19 | 11:46:25.197 on 18-Mar-2005 | 8.544   | 19 | 2.70808 | 0.0785551 | 2.70808 | 0.0785551 | 1 | 2 |
| 692 | Track 48 | 11:46:25.300 on 18-Mar-2005 | 6.1554  | 48 | 2.72113 | 0.0788975 | 2.72113 | 0.0788975 | 1 | 2 |
| 674 | Track 30 | 11:46:25.237 on 18-Mar-2005 | 8.79303 | 30 | 2.95884 | 0.0864793 | 2.95884 | 0.0864793 | 1 | 2 |
| 671 | Track 27 | 11:46:25.223 on 18-Mar-2005 | 8.13277 | 27 | 3.02382 | 0.0878291 | 3.02382 | 0.0878291 | 1 | 2 |

**Mean****SD**

Mean Meandering Index 3 points or more: 0.649376906 0.240373982

Mean Meandering Index 4 points or more: 0.56394461 0.228771222

Mean Meandering Index 5 points of more: 0.526544519 0.210518786

Mean Meandering Index 6 points of more: 0.524103059 0.228443225

Mean Velocity of 3 points of more: 0.024277492 0.011384791
